# Supplementary material for: PR55α-controlled protein phosphatase 2A inhibits p16 expression and blocks cellular senescence induction by γ-irradiation
Source: Aging (Albany NY). 2024 Mar 4;16(5):4116–37. doi: 10.18632/aging.205619 (PMC10968692; doi:10.18632/aging.205619)
Supplement: Supplementary Table 1 [file aging-16-205619-s001.pdf]

## SUPPLEMENTARY TABLE

**Supplementary Table 1. Human normal tissue samples from various organs/sites of young and old individuals were used to assess PR55 $\alpha$  and p16 protein expression by immunohistochemistry with H-score.**

| Case | Cohort | Tissue                                  | Age | Gender | H-Score PR55 $\alpha$ | H-Score p16 |
|------|--------|-----------------------------------------|-----|--------|-----------------------|-------------|
| 1    | Young  | alveoli                                 | 1   | Female | 4.0                   | 0.0         |
| 2    | Young  | alveoli                                 | 1   | Female | 0.2                   | 0.0         |
| 3    | Young  | mucosa assoc. lymphoid tissue, appendix | 6   | Male   | 0.1                   | 0.0         |
| 4    | Young  | mucosa assoc. lymphoid tissue, appendix | 6   | Male   | 0.1                   | 0.0         |
| 5    | Young  | alveoli                                 | 1   | Female | 4.5                   | 0.0         |
| 6    | Young  | thymus                                  | 19  | Female | 7.5                   | 1.5         |
| 7    | Young  | thymus                                  | 19  | Female | 4.5                   | 0.9         |
| 8    | Young  | thymus                                  | 19  | Female | 6.0                   | 1.2         |
| 9    | Young  | skin, squamous epithelium               | 23  | Female | 0.1                   | 0.2         |
| 10   | Young  | skin, squamous epithelium               | 23  | Female | 0.1                   | 0.1         |
| 11   | Young  | skin, squamous epithelium               | 23  | Female | 0.2                   | 0.1         |
| 12   | Young  | Breast, epithelium                      | 23  | Female | 7.5                   | 0.4         |
| 13   | Young  | Breast, epithelium                      | 23  | Female | 8.0                   | 0.8         |
| 14   | Young  | Breast, epithelium                      | 23  | Female | 7.0                   | 0.9         |
| 15   | Young  | tonsil, squamous epithelium             | 24  | Female | 7.0                   | 0.4         |
| 16   | Young  | tonsil, squamous epithelium             | 24  | Female | 9.0                   | 0.8         |
| 17   | Young  | kidney, cortex                          | 25  | Male   | 8.0                   | 0.2         |
| 18   | Young  | kidney, medulla                         | 25  | Male   | 7.5                   | 0.1         |
| 19   | Young  | kidney, medulla                         | 25  | Male   | 1.5                   | 0.1         |
| 20   | Young  | ectocervix                              | 26  | Female | 0.2                   | 1.5         |
| 21   | Young  | Smooth muscle, uterus                   | 28  | Female | 3.0                   | 0.3         |
| 22   | Young  | Smooth muscle, uterus                   | 28  | Female | 2.0                   | 0.0         |
| 23   | Young  | Smooth muscle, uterus                   | 28  | Female | 3.0                   | 0.3         |
| 24   | Young  | Ovary, 1' oocytes                       | 33  | Female | 9.0                   | 0.3         |
| 25   | Young  | Ovary, 1' oocytes                       | 33  | Female | 0.0                   | 0.2         |
| 26   | Young  | Ovary, 1' oocytes                       | 33  | Female | 0.2                   | 0.2         |
| 27   | Young  | ovary, corpus luteum                    | 33  | Female | 6.5                   | 0.9         |
| 28   | Young  | ovary, corpus luteum                    | 33  | Female | 7.5                   | 1.5         |
| 29   | Young  | ovary, corpus luteum                    | 33  | Female | 8.0                   | 0.9         |
| 30   | Young  | endocervix                              | 37  | Female | 1.0                   | 0.0         |
| 31   | Young  | endocervix                              | 37  | Female | 0.2                   | 0.0         |
| 32   | Young  | amniotic membrane                       | 39  | Female | 4.0                   | 0.0         |
| 33   | Young  | amniotic membrane                       | 39  | Female | 2.0                   | 0.2         |
| 34   | Young  | amniotic membrane                       | 39  | Female | 9.0                   | 0.9         |
| 35   | Young  | fallopian tube                          | 43  | Female | 10.0                  | 0.3         |
| 36   | Young  | fallopian tube                          | 43  | Female | 13.0                  | 0.2         |
| 37   | Young  | fallopian tube                          | 43  | Female | 2.0                   | 0.0         |
| 38   | Old    | thyroid                                 | 68  | Female | 0.2                   | 0.0         |
| 39   | Old    | thyroid                                 | 68  | Female | 0.0                   | 0.1         |
| 40   | Old    | adrenal gland, cortex                   | 71  | Male   | 8.0                   | 0.1         |
| 41   | Old    | adrenal gland, cortex                   | 71  | Male   | 8.0                   | 0.0         |
| 42   | Old    | adrenal gland, medulla                  | 71  | Male   | 10.0                  | 0.1         |
| 43   | Old    | adrenal gland, medulla                  | 71  | Male   | 7.0                   | 0.1         |

|    |     |                            |    |        |     |     |
|----|-----|----------------------------|----|--------|-----|-----|
| 44 | Old | adrenal gland, medulla     | 71 | Male   | 4.0 | 0.0 |
| 45 | Old | esophagus, squamous mucosa | 74 | Female | 4.5 | 0.1 |
| 46 | Old | esophagus, squamous mucosa | 74 | Female | 6.0 | 0.3 |
| 47 | Old | esophagus, squamous mucosa | 74 | Female | 5.0 | 3.0 |
| 48 | Old | peripheral nerve           | 73 | Female | 0.4 | 0.1 |
| 49 | Old | peripheral nerve           | 73 | Female | 0.4 | 0.0 |
| 50 | Old | peripheral nerve           | 73 | Female | 0.4 | 0.0 |
| 51 | Old | cartilage, articular       | 73 | Female | 0.8 | 0.0 |
| 52 | Old | aorta, smooth muscle       | 85 | Female | 0.1 | 0.0 |

The “Young” cohort was  $\leq 43$  years old; the “Old” cohort was  $\geq 68$  years old.
